# Supplementary material
Source: PubMed Central journal article supplement (PMC2446524)
Supplement: supp_74_13_4236__1.pdf [file supp_74_13_4236__1.pdf]

## **Primers and PCR conditions**

### **16S rDNA universal $\gamma$ -proteobacterial primers:**

16Sup1 (5'-AGAGTTTGATCATGGCTCAGATTG-3') and

16Slo1 (5'-TACCTTGTTACGACTTCACCCCAG-3')

PCR conditions were 94°C for 2 min, followed by 30 cycles of 94°C for 15 s, 60°C for 30 s, and 72°C for 1 min. Mixtures of PCR consisted of 1.5 units of Taq DNA polymerase (Promega), 200  $\mu$ M deoxynucleotide triphosphate, 0.2  $\mu$ M primers, and 10 ng of DNA template in a final volume of 50  $\mu$ l.

### **atpD primers:**

atpD\_3F (5'- GGTAARGTNGGTCTDTTYGGYGGTGC-3') and

atpD\_2R (5'- YTTCAGAYAAAYTCRTCCATACC-3').

PCR conditions were: 94°C for 2 min, followed by 30 cycles of 94°C for 15 s, 50°C for 30 s, and 72°C for 1 min. Mixtures of PCR consisted of 1.5 units of Taq DNA polymerase (Promega), 200  $\mu$ M deoxynucleotide triphosphate, 0.2  $\mu$ M primers, and 10 ng of DNA template in a final volume of 50  $\mu$ l.
